# Supplementary material for: The Discriminative Efficacy of Retinal Characteristics on Two Traditional Chinese Syndromes in Association with Ischemic Stroke
Source: Hindawi journal article supplement (doi:10.1155/2020/6051831), 2020-01-01
Supplement: f1 [file 6051831.f1.zip]

Supplementary for univariate analysis:

Part1. For continuous variables

a) Clinical characteristics

| Tests of Normality |                                 |     |      |              |     |      |
|--------------------|---------------------------------|-----|------|--------------|-----|------|
|                    | Kolmogorov-Smirnov <sup>a</sup> |     |      | Shapiro-Wilk |     |      |
|                    | Statistic                       | df  | Sig. | Statistic    | df  | Sig. |
| age                | .083                            | 195 | .002 | .979         | 195 | .005 |
| BMI                | .095                            | 195 | .000 | .925         | 195 | .000 |

a. Lilliefors Significance Correction

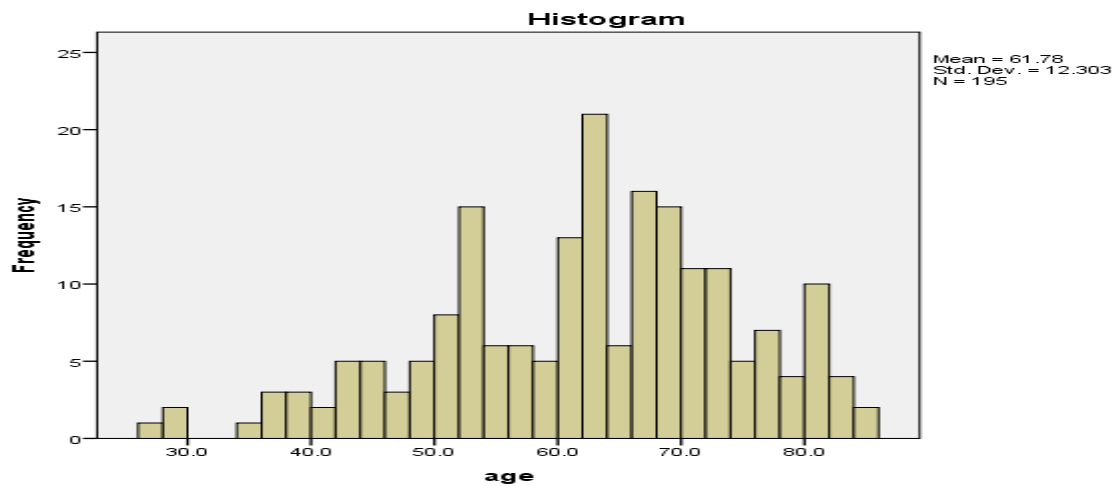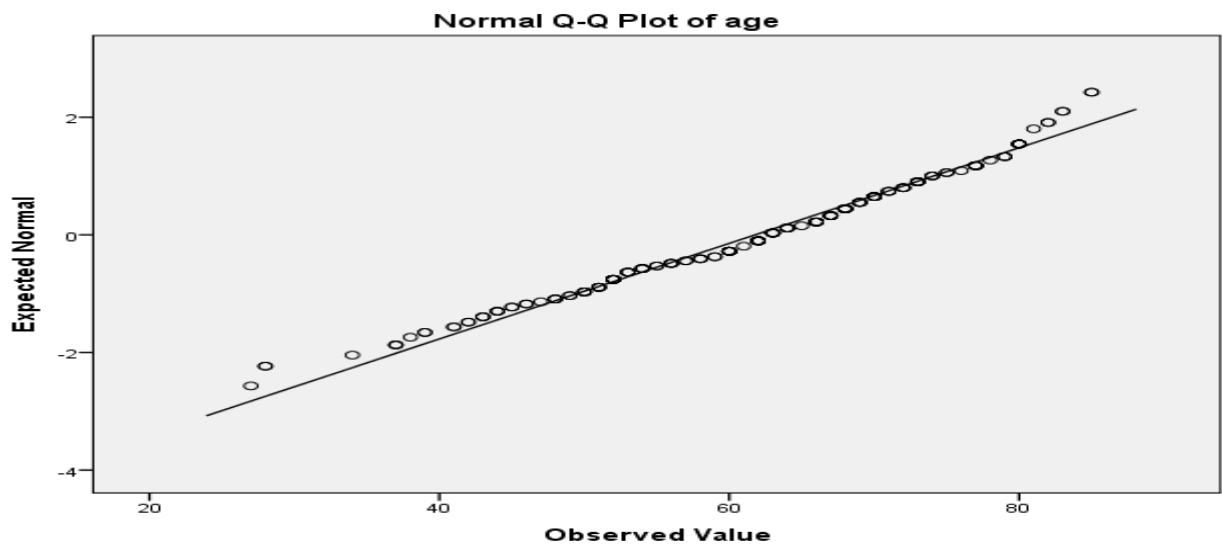

Comments: slightly skew to left. For safety we may use nonparametric test.

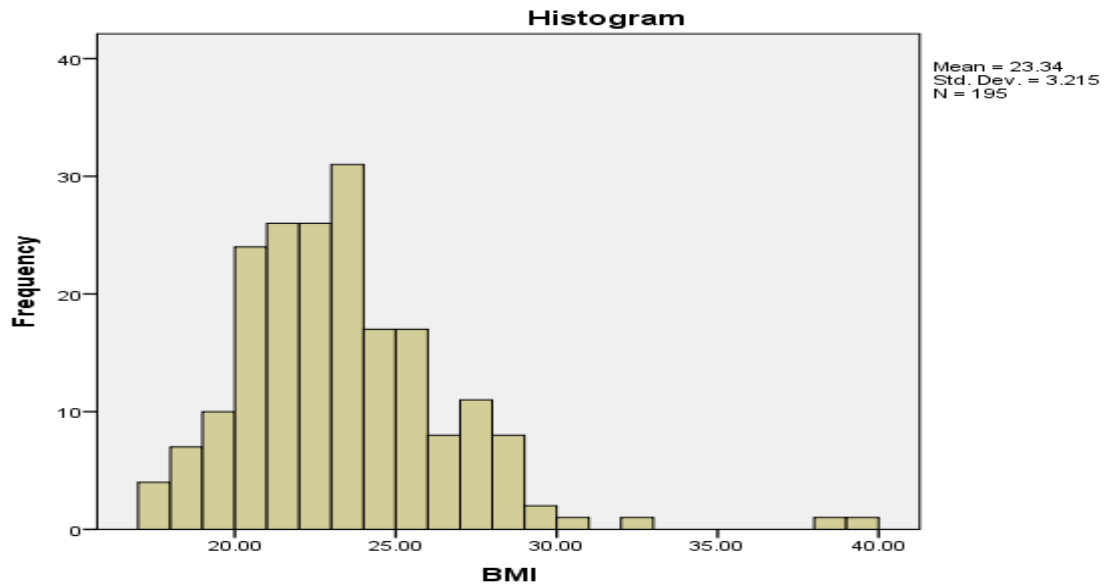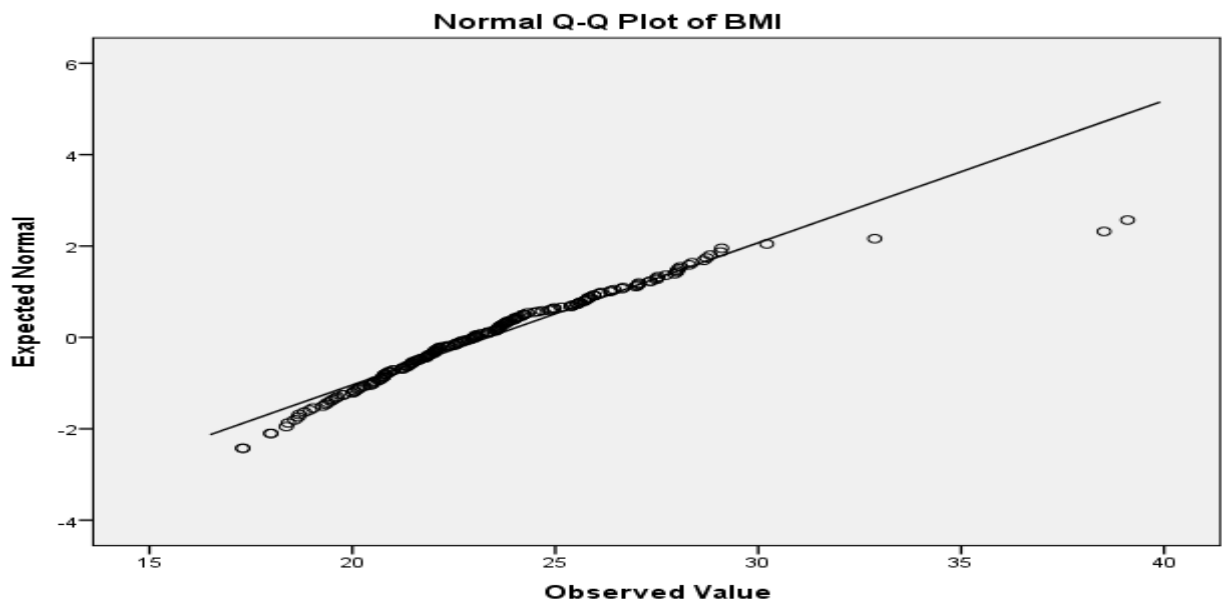

Comments: there exist outliers causing the distribution a bit of serious skewed to right.  
So may apply nonparametric method (Mann-Whitney test).

Remarks: There exist outliers in BMI, one way we can solved is remove these two outlier then redo the analysis. The other way we can transform using such as square root or log function to be more normal distribution like. The last option we can use the conservative approach of nonparametric method of Mann-Whitney test. For the safety we may use the last one. Also all normality test above shown the rejection of normality assumption.

After we applied the Mann-Whitney U test, we have

| Test Statistics <sup>a</sup> |          |          |
|------------------------------|----------|----------|
|                              | age      | BMI      |
| Mann-Whitney U               | 3930.500 | 3845.500 |
| Wilcoxon W                   | 8880.500 | 7166.500 |
| Z                            | -.227    | -.472    |
| Asymp. Sig. (2-tailed)       | .820     | .637     |

a. Grouping Variable: TCM2type

**Remarks:** These results may need to be replaced in Table1.

b) Retinal characteristics

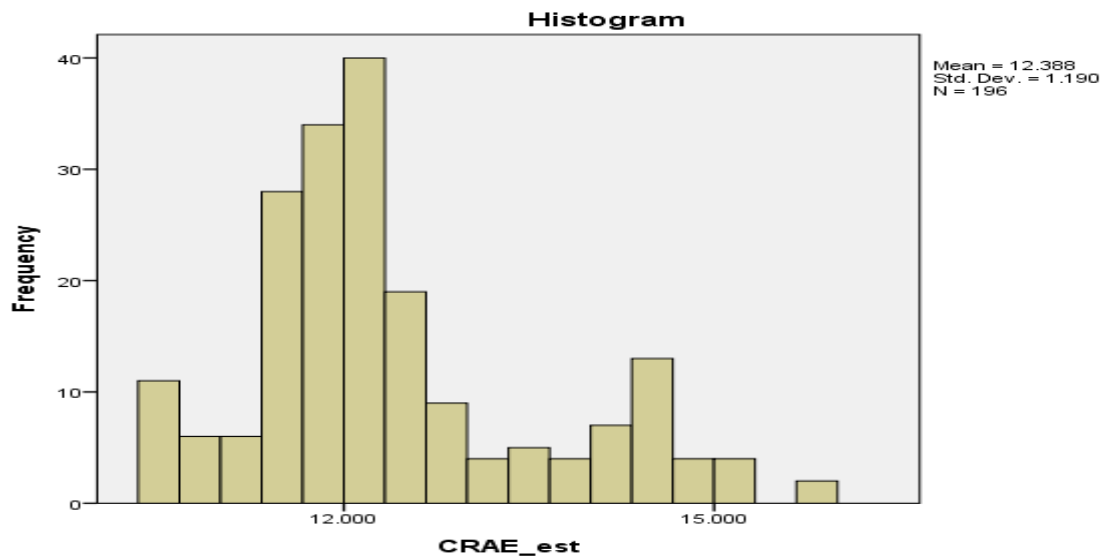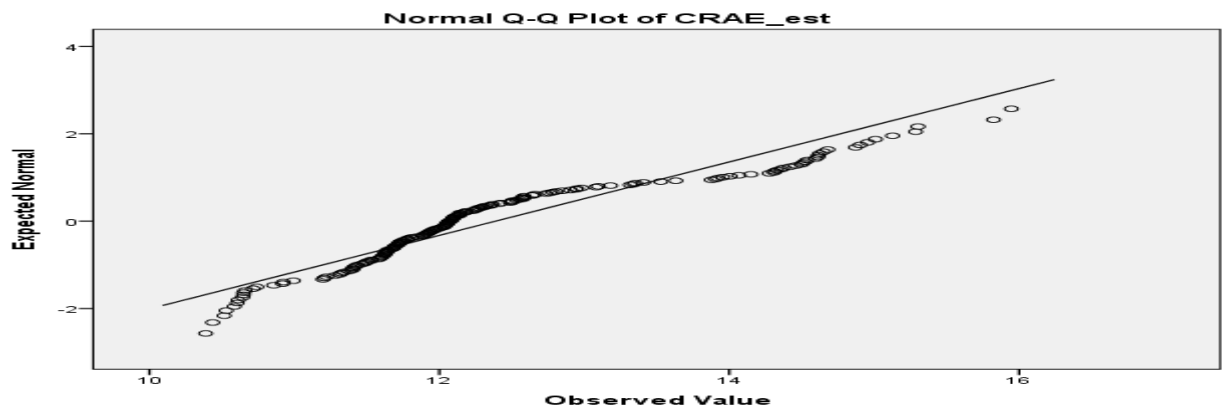

Comments: A bit of skewed to right

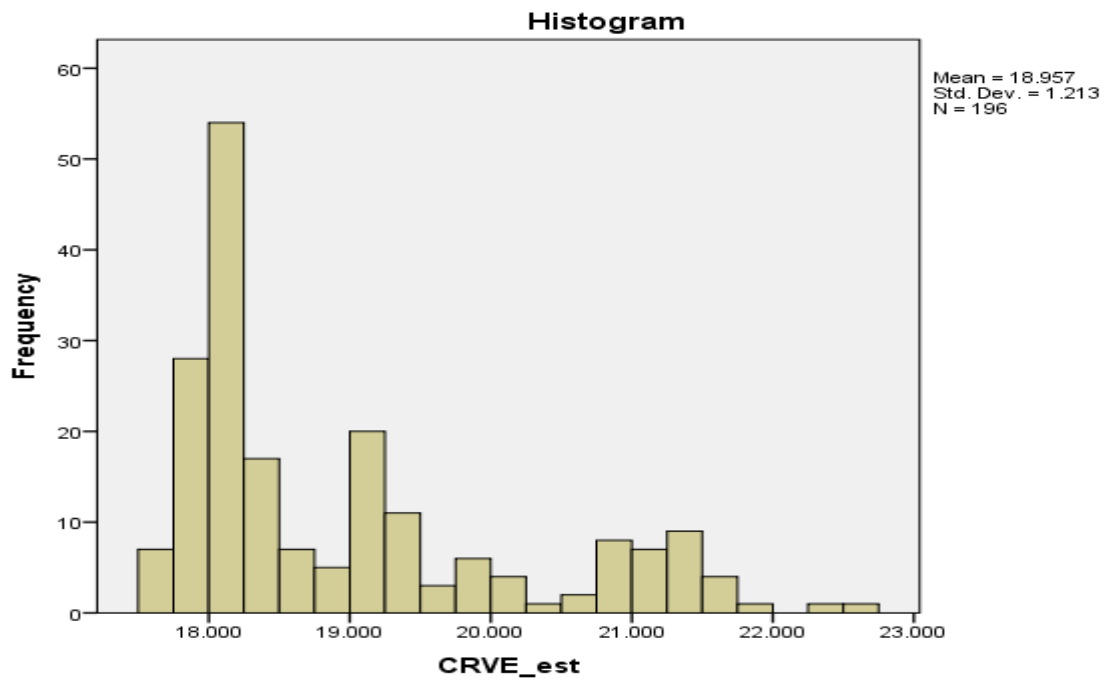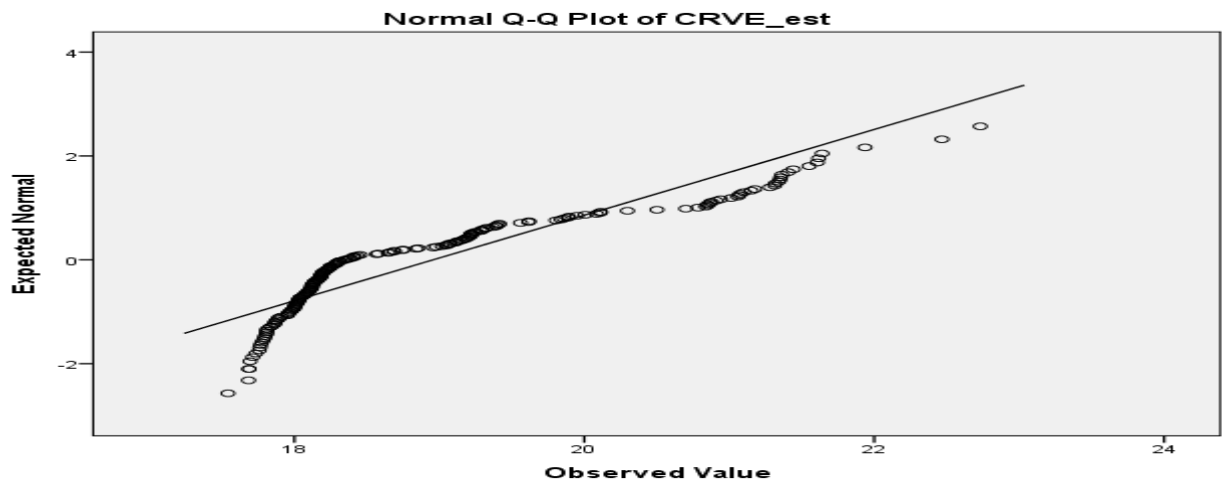

Comments: skewed to right

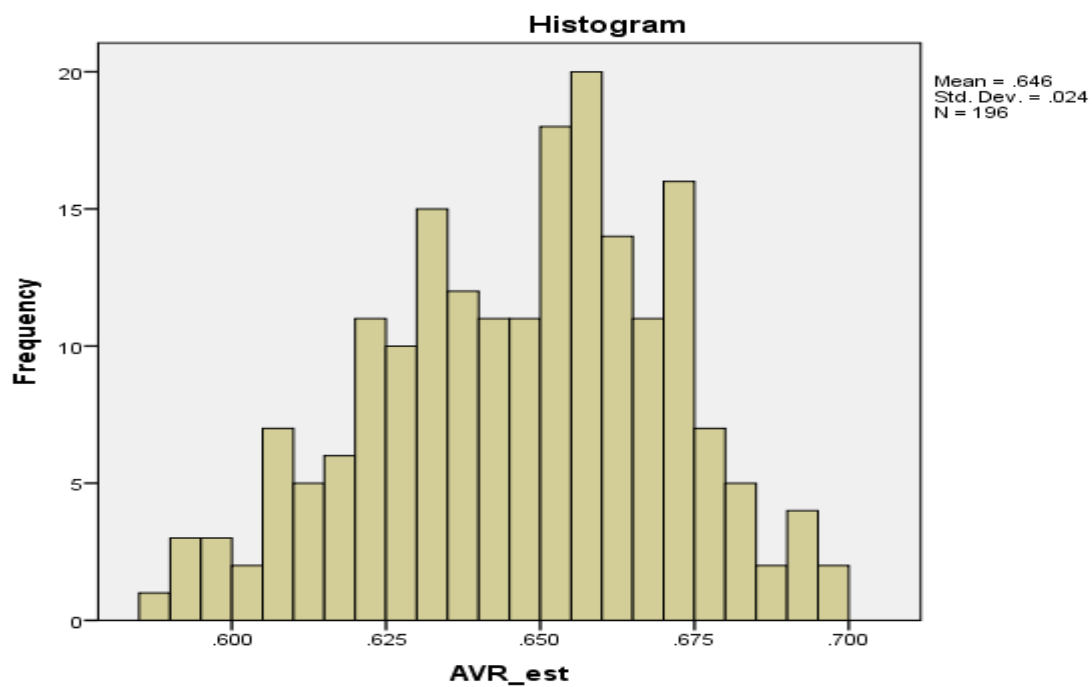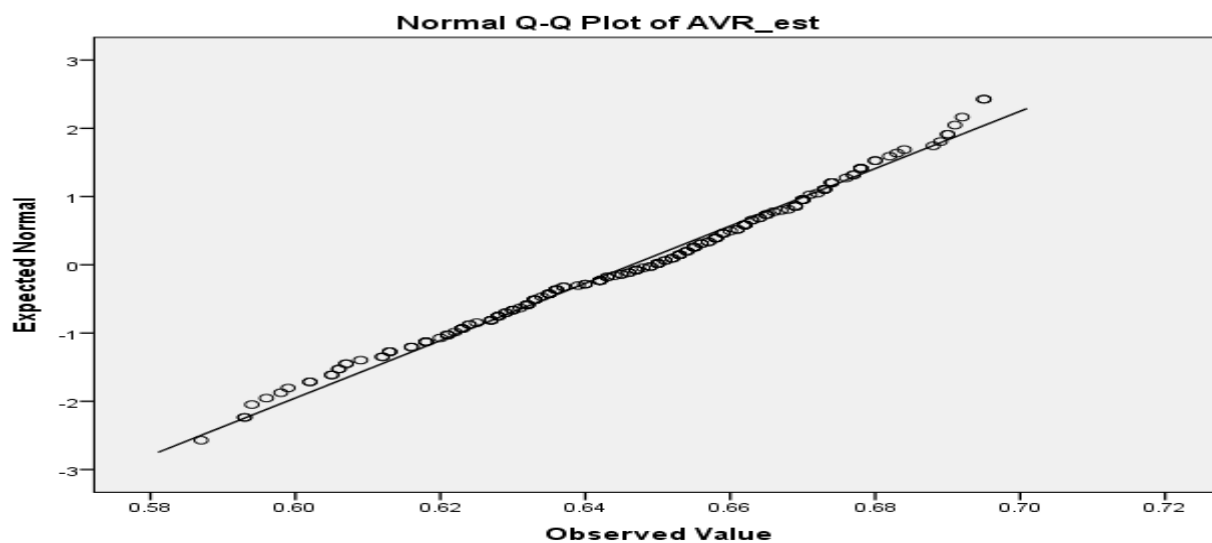

Comments: approximately normal

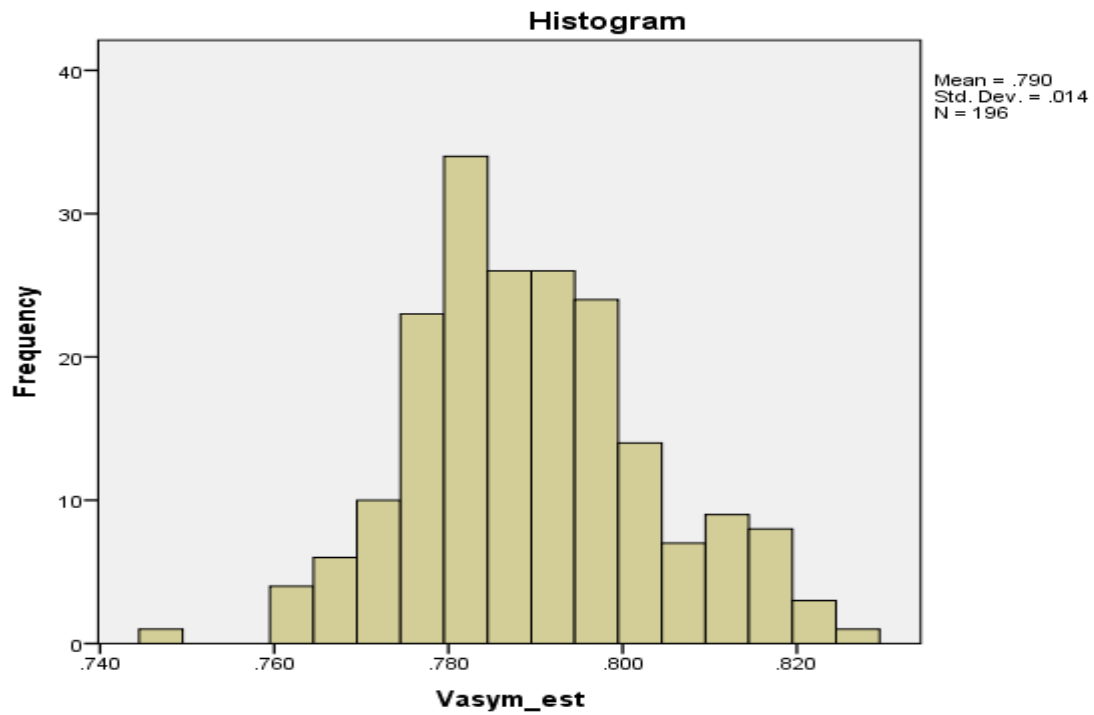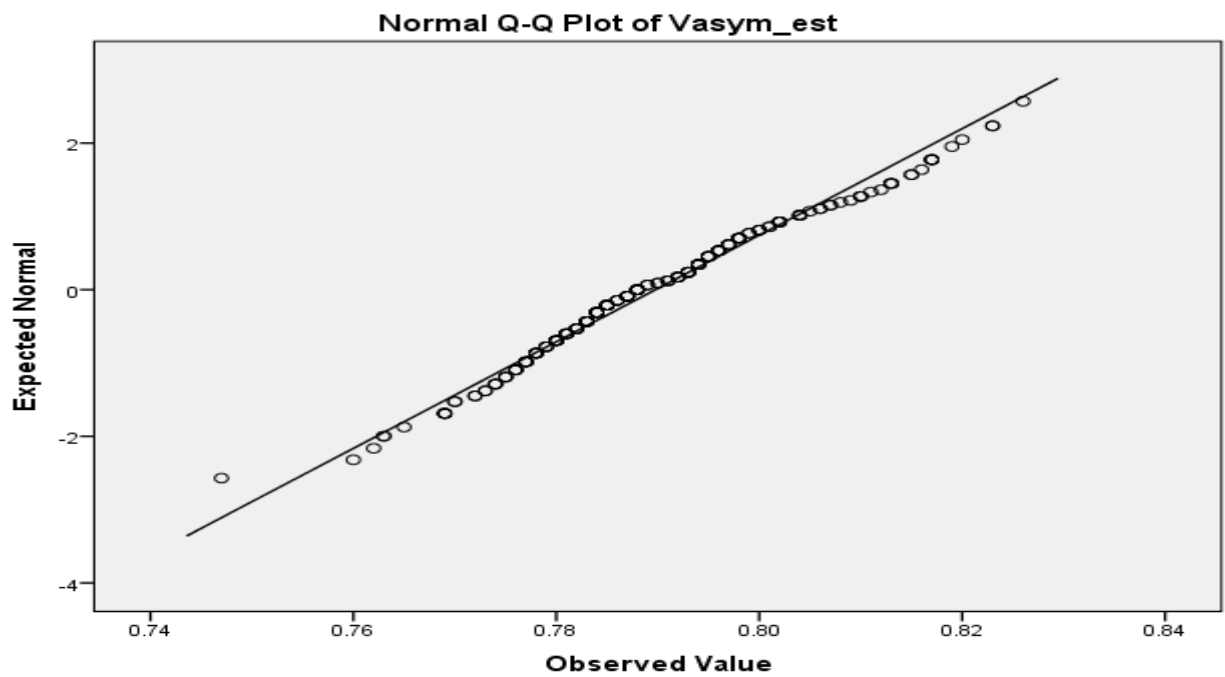

Comments: approximately normal.

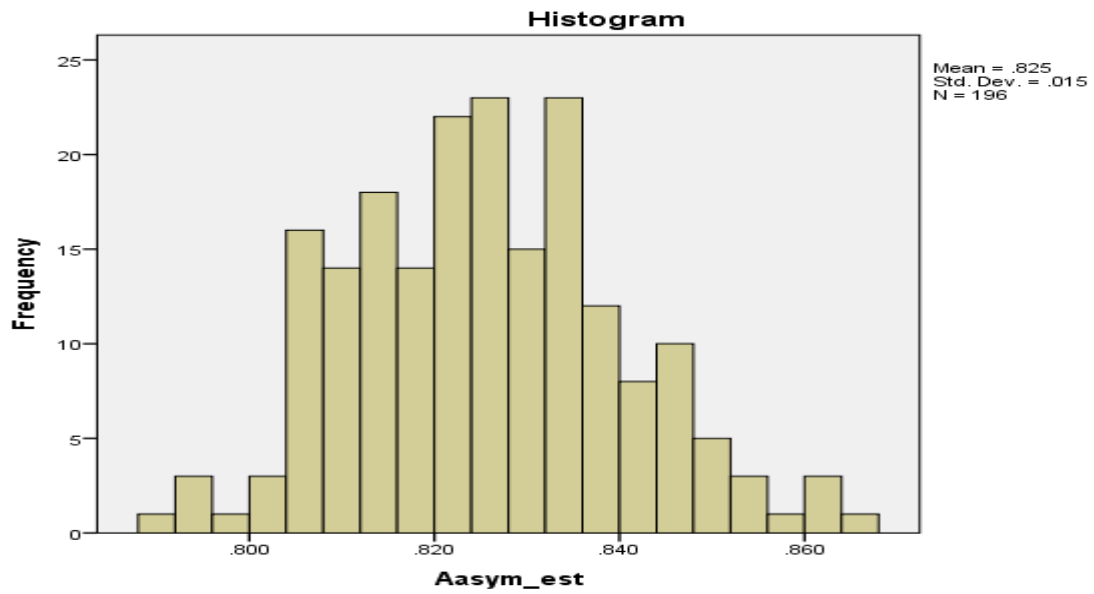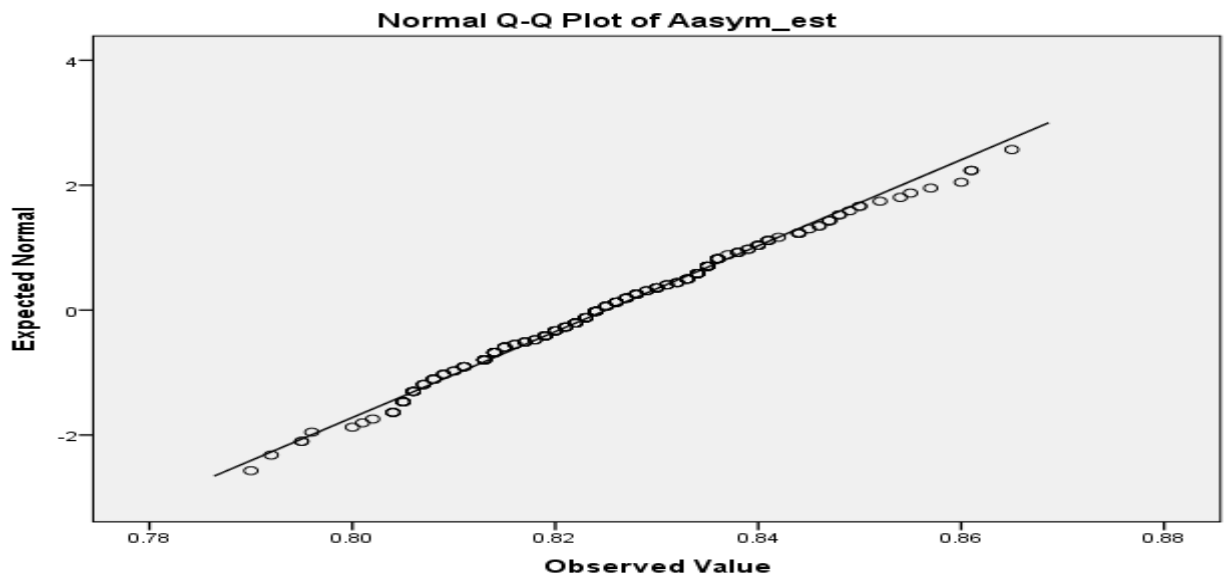

Comments:

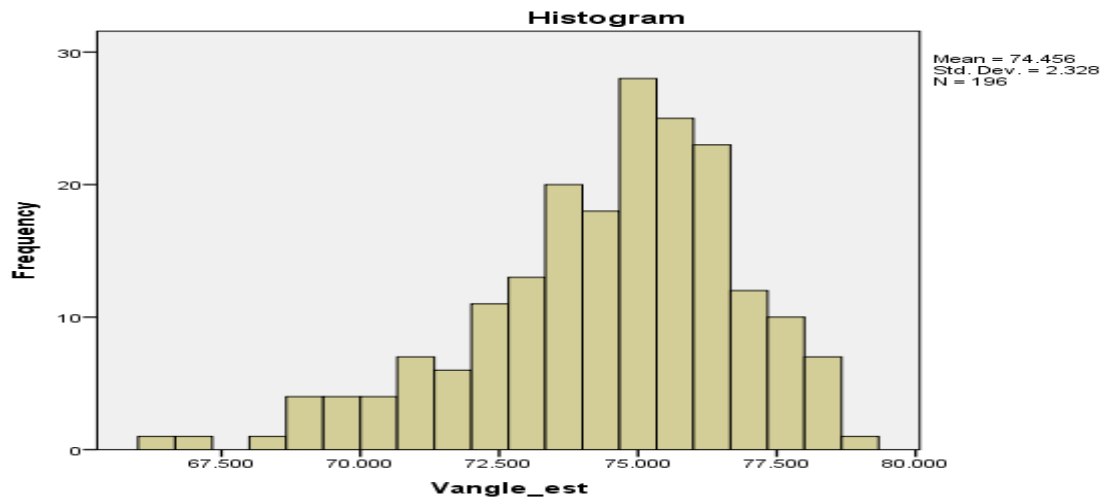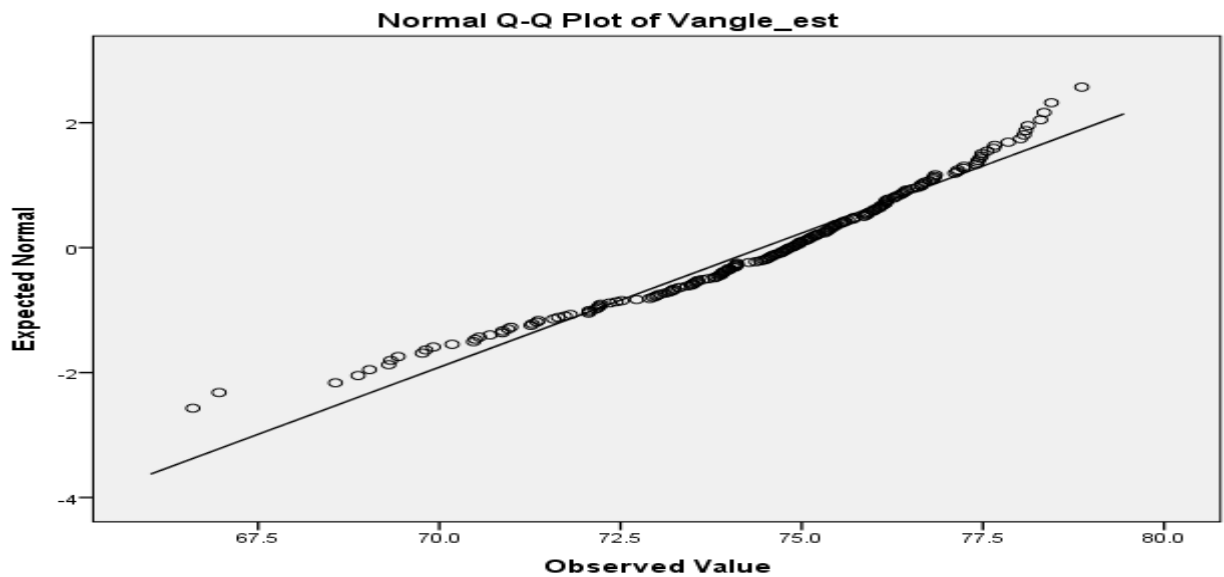

Comments: skewed to left.

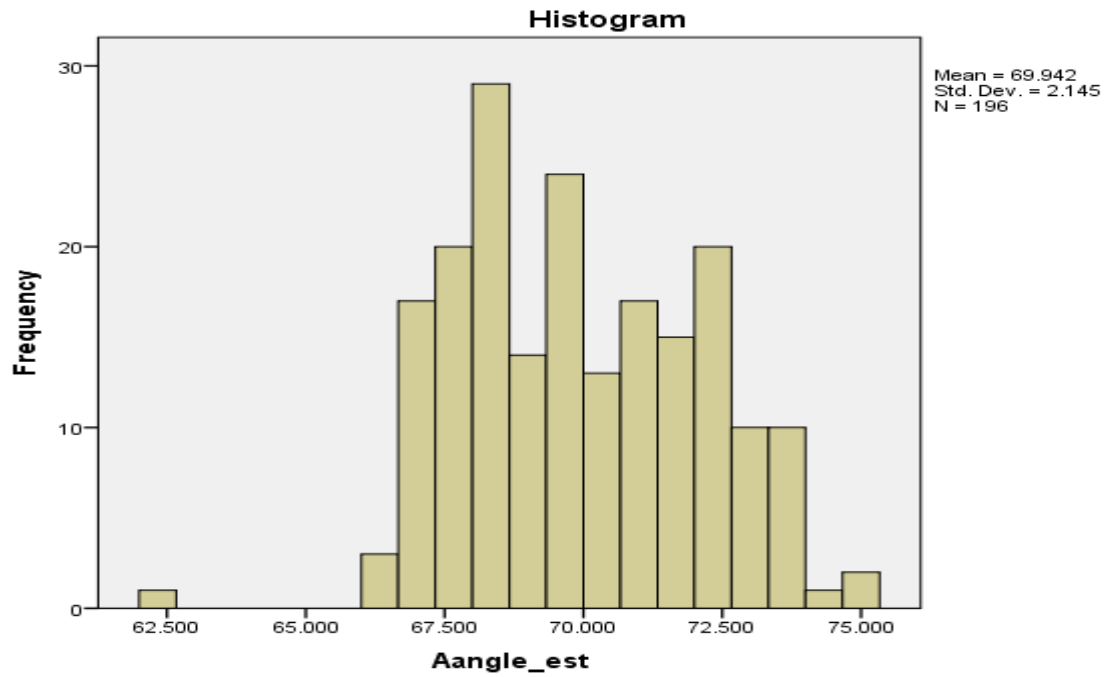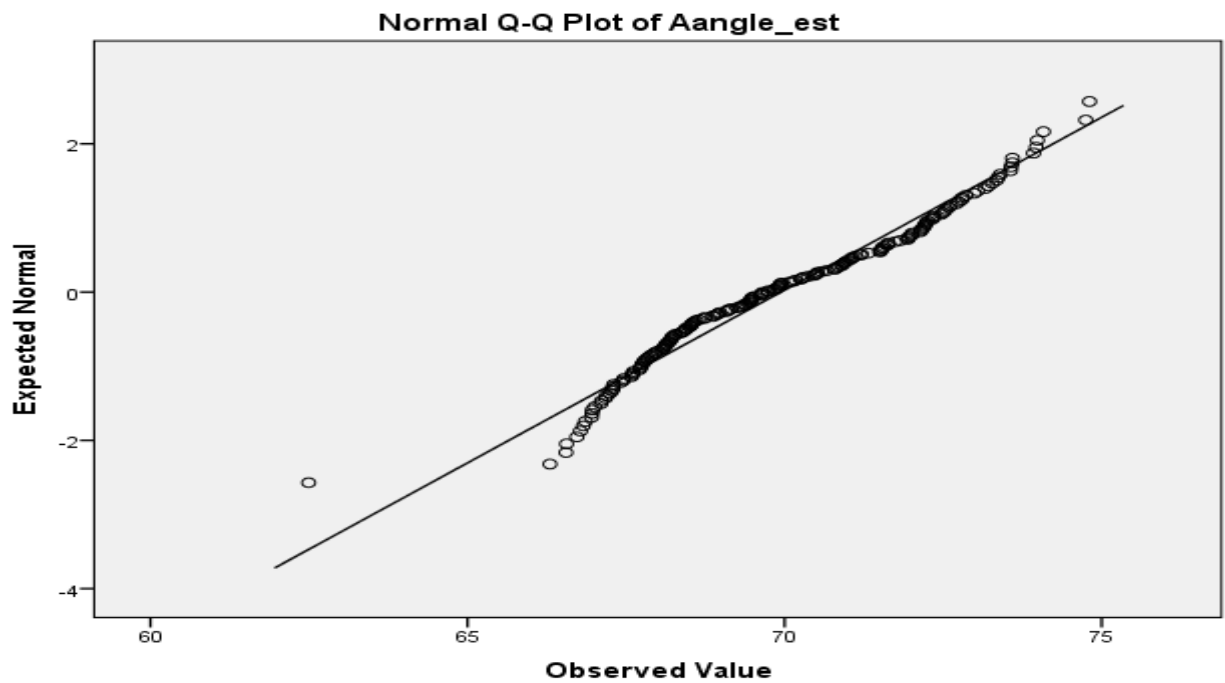

Comments: Thickness Biased in right

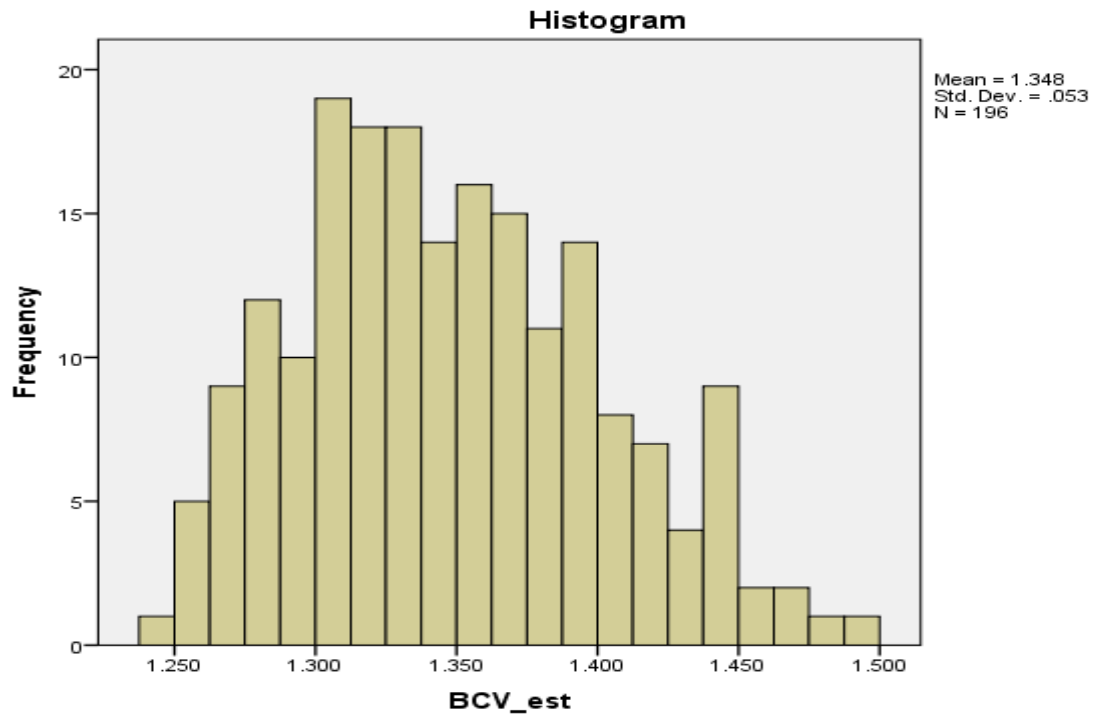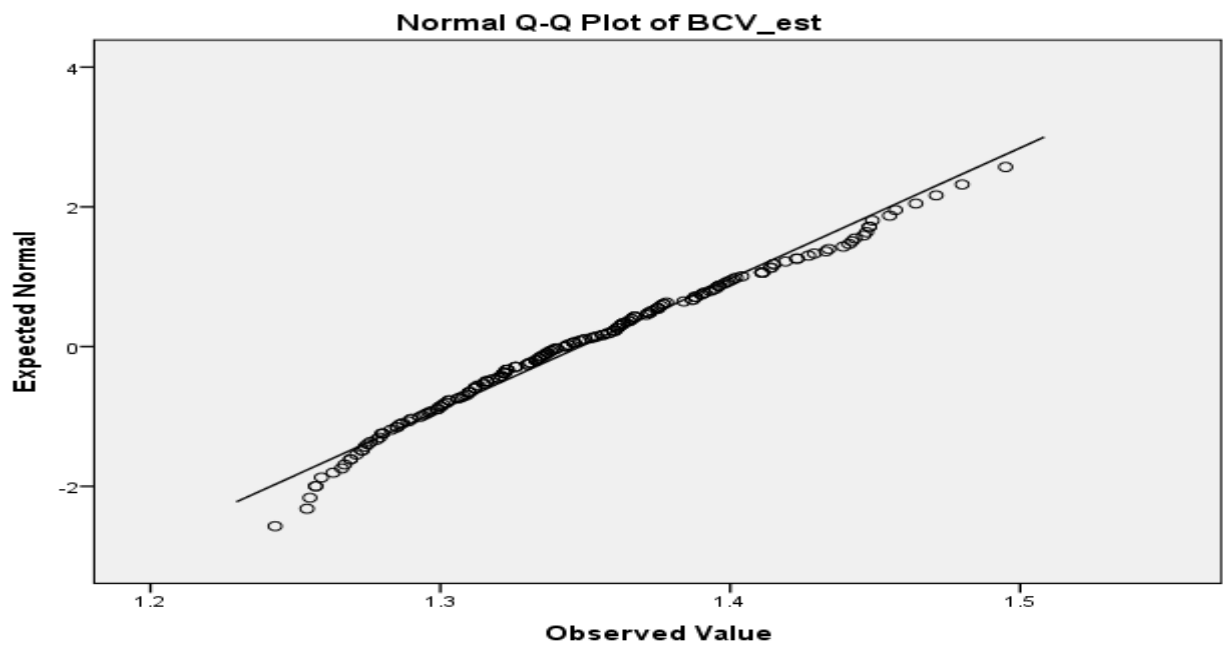

Comments: Thickness Biased in left

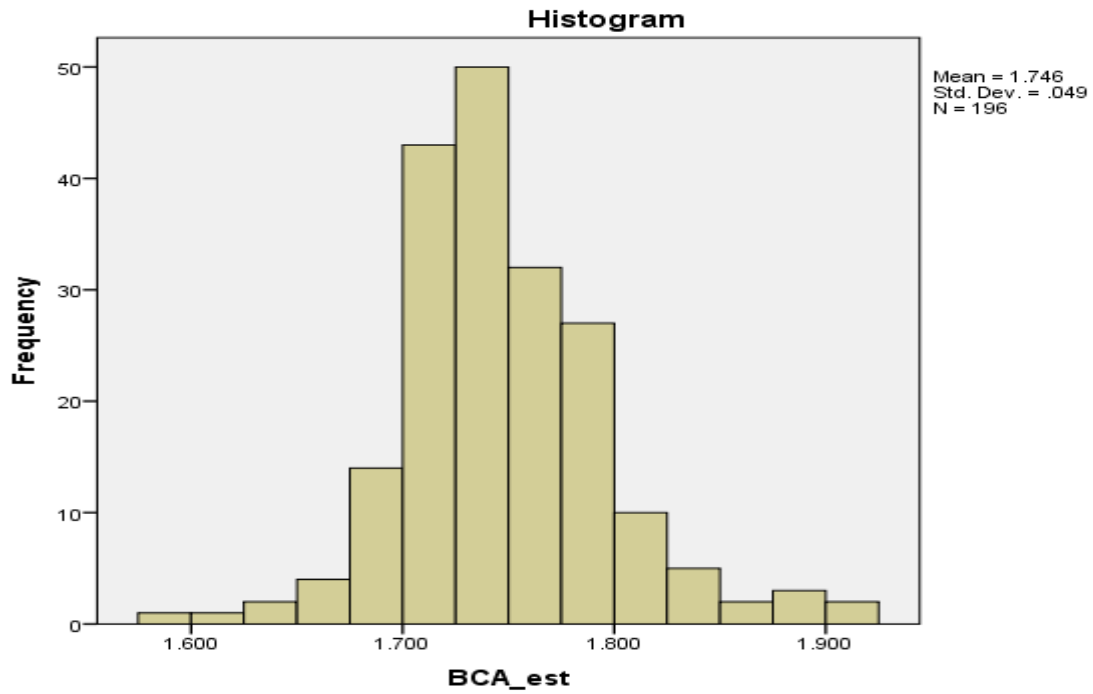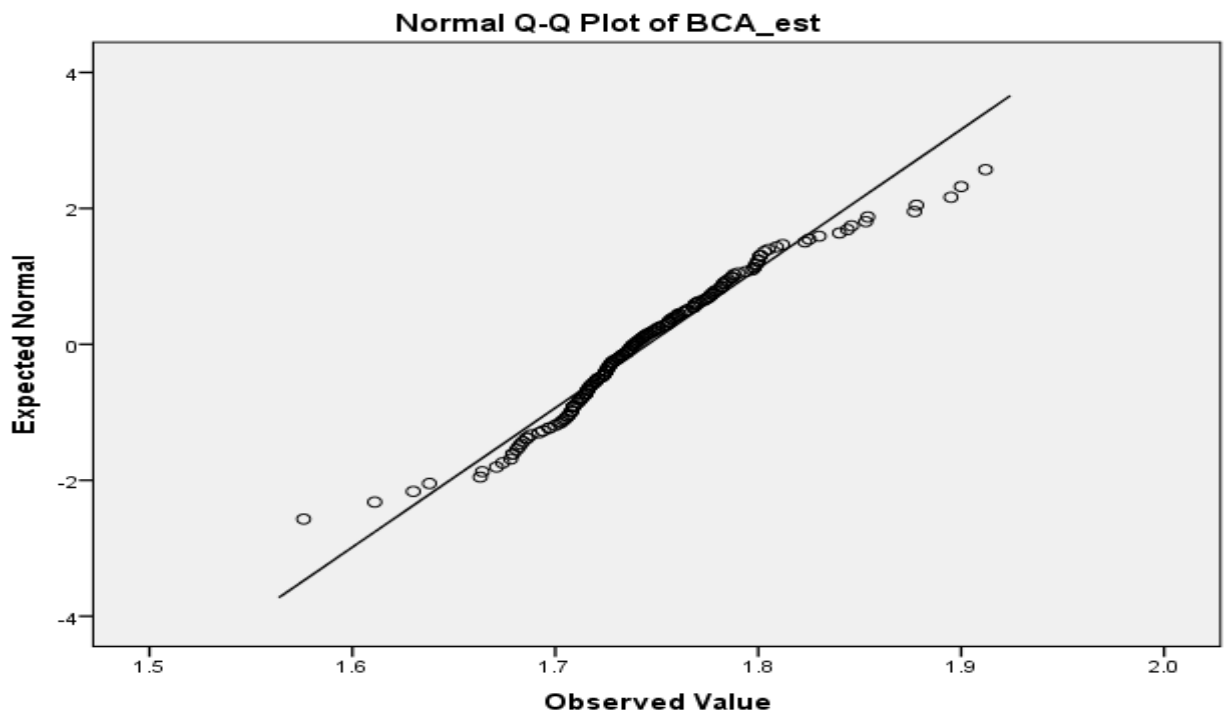

Comments: Thickness Biased in right (not in normal)

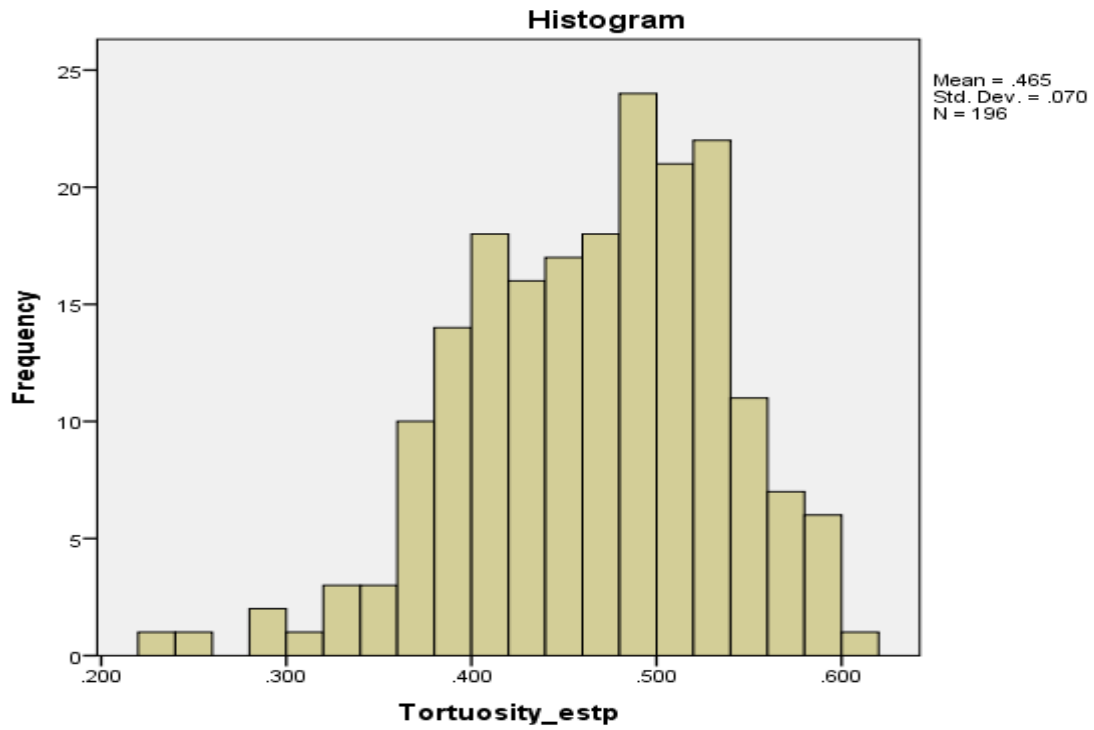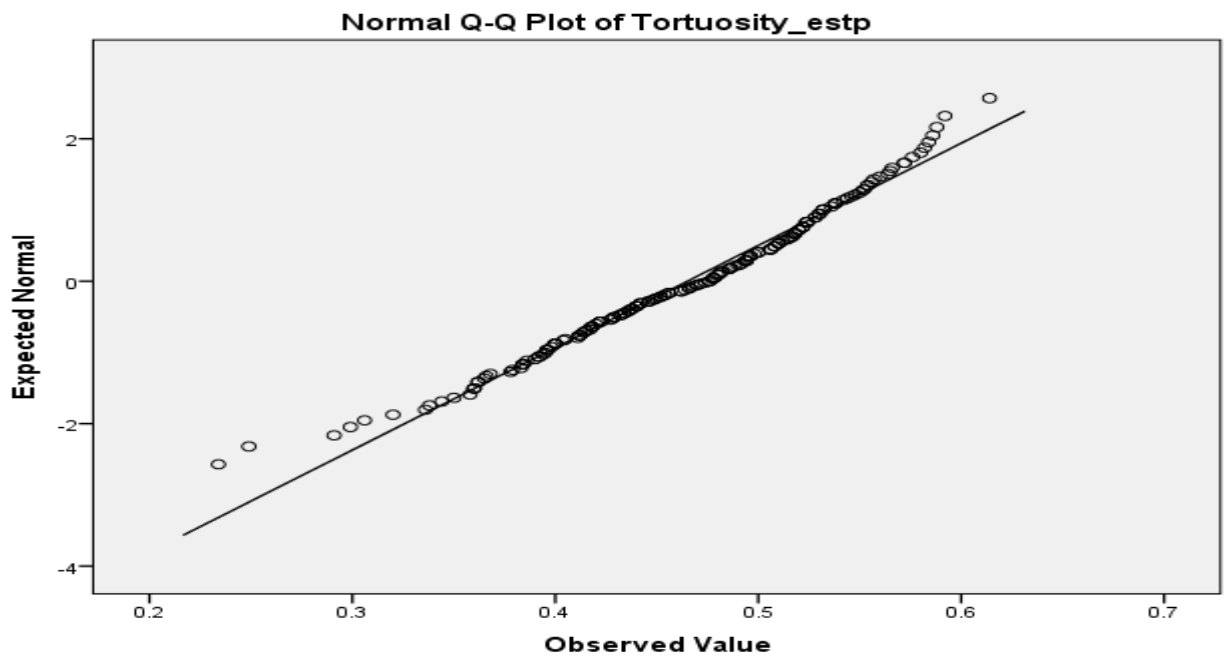

Comments: Thickness Biased in right (not in normal)

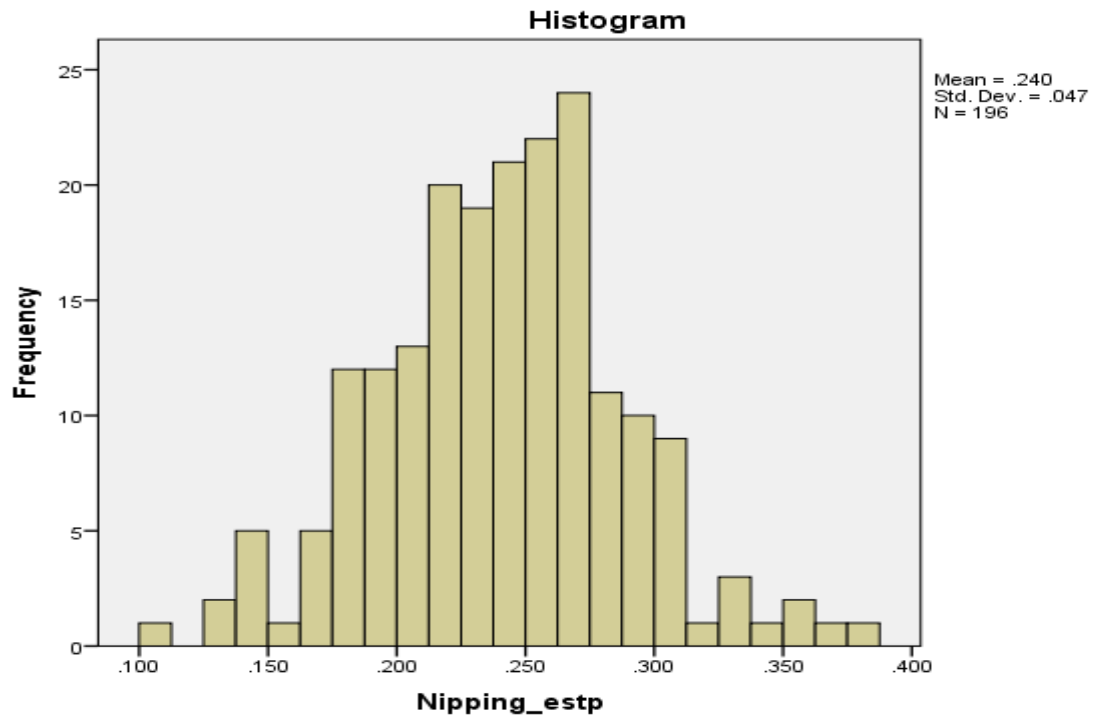

Comments: Thickness Biased in left

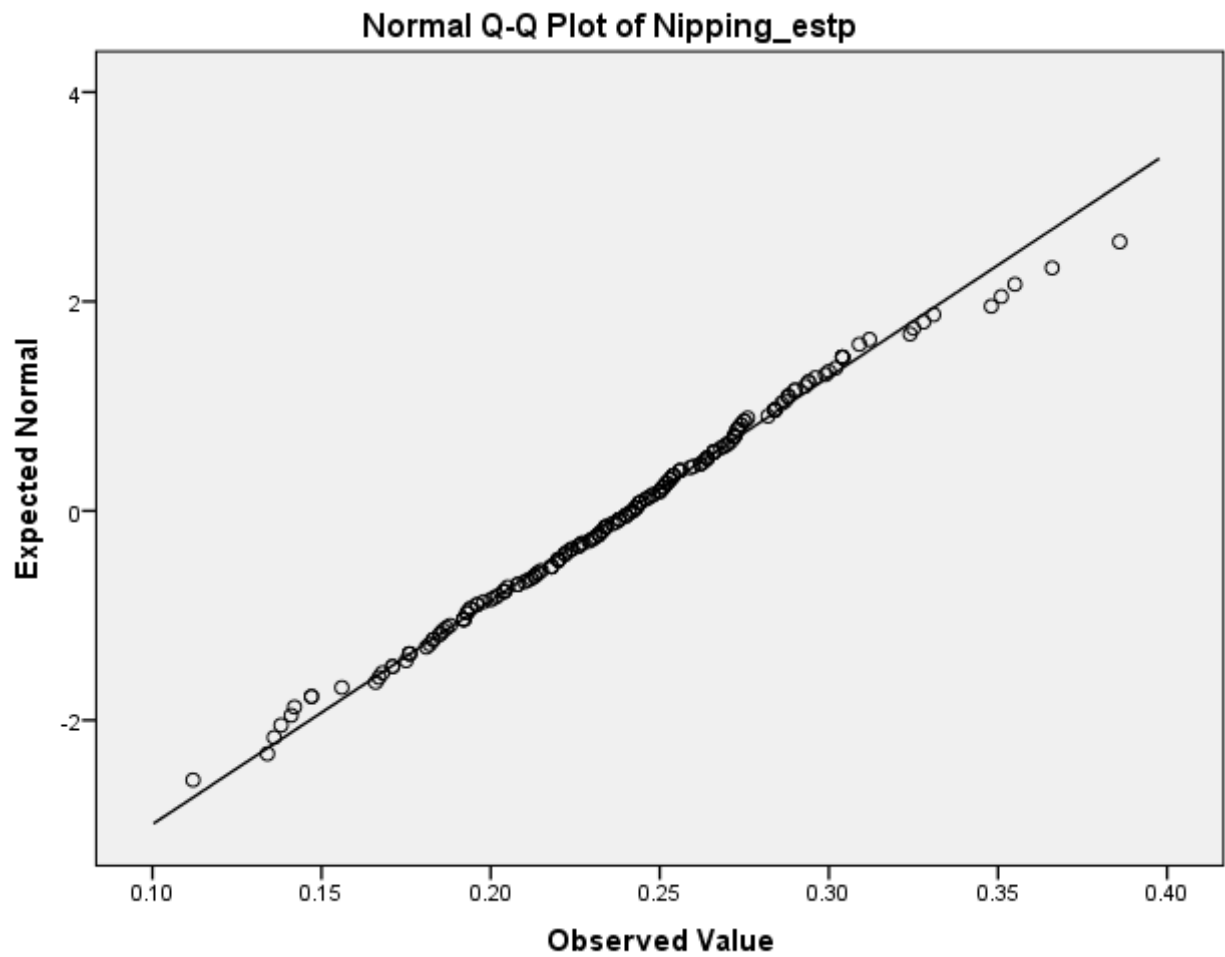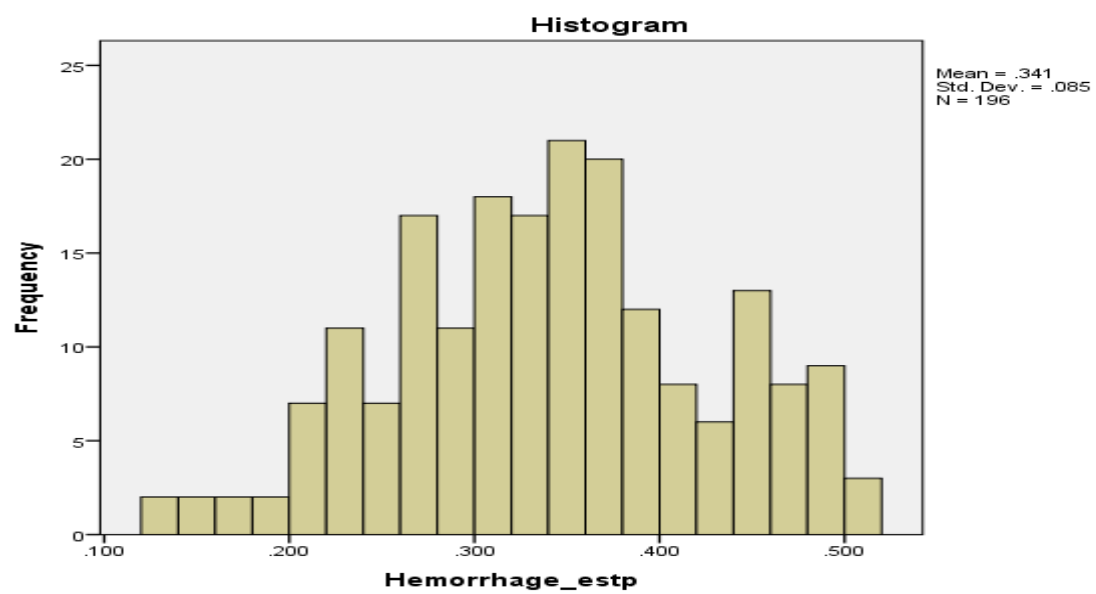

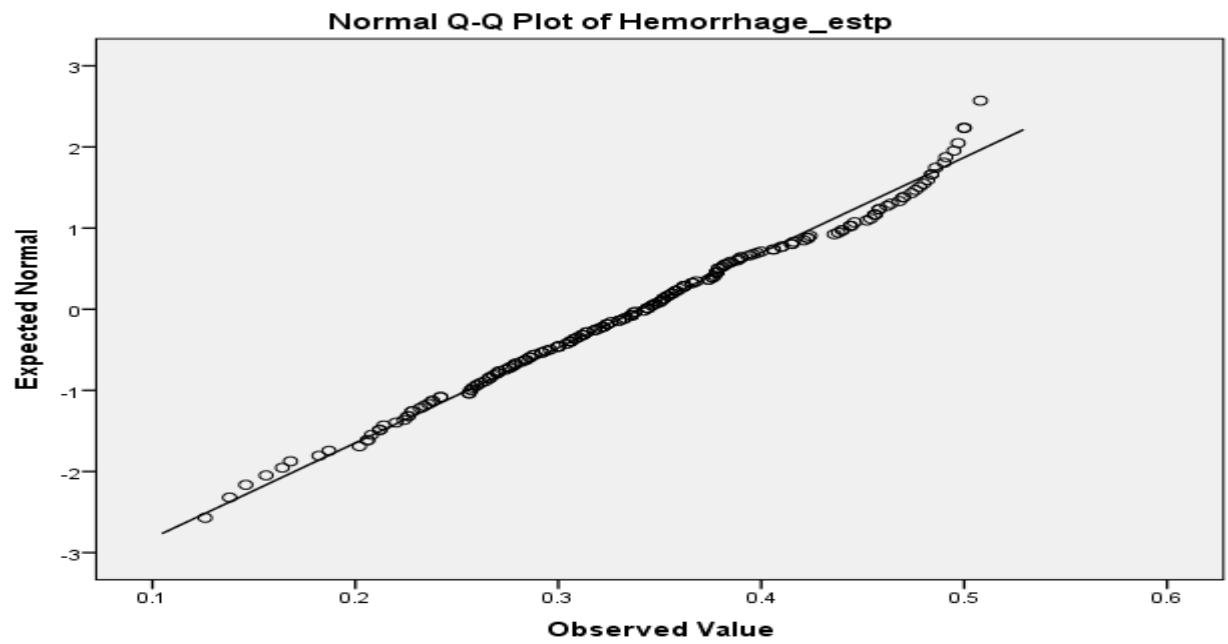

Comments: approximately normal distribution

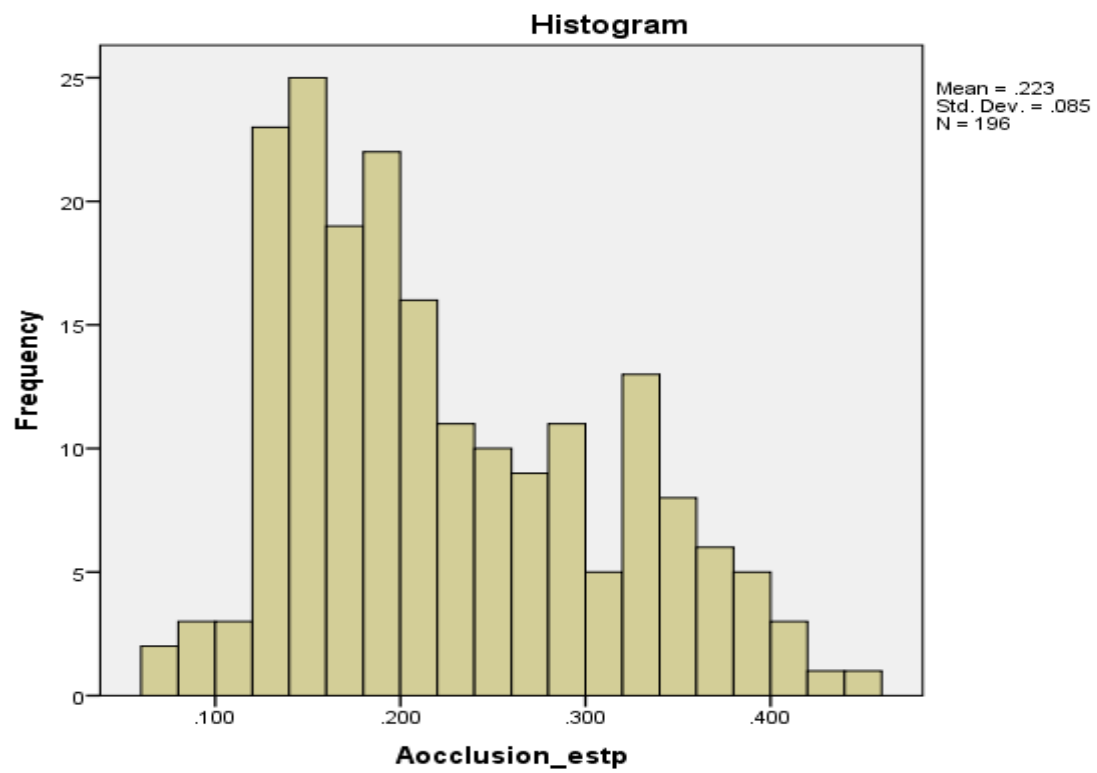

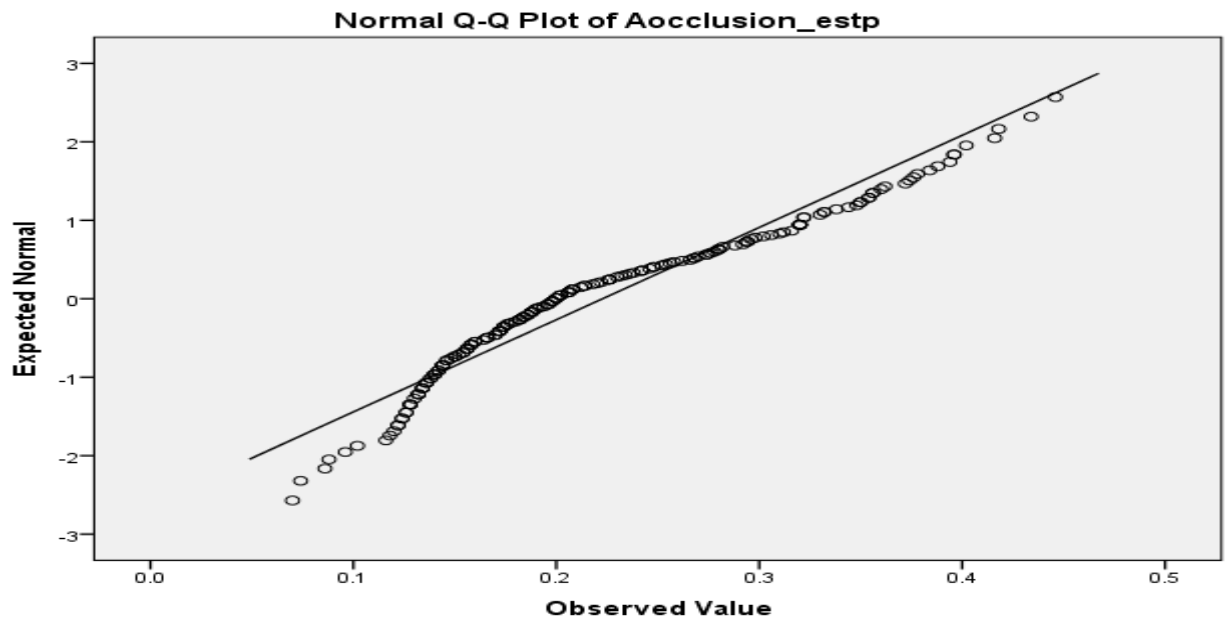

Comments: skewed to right

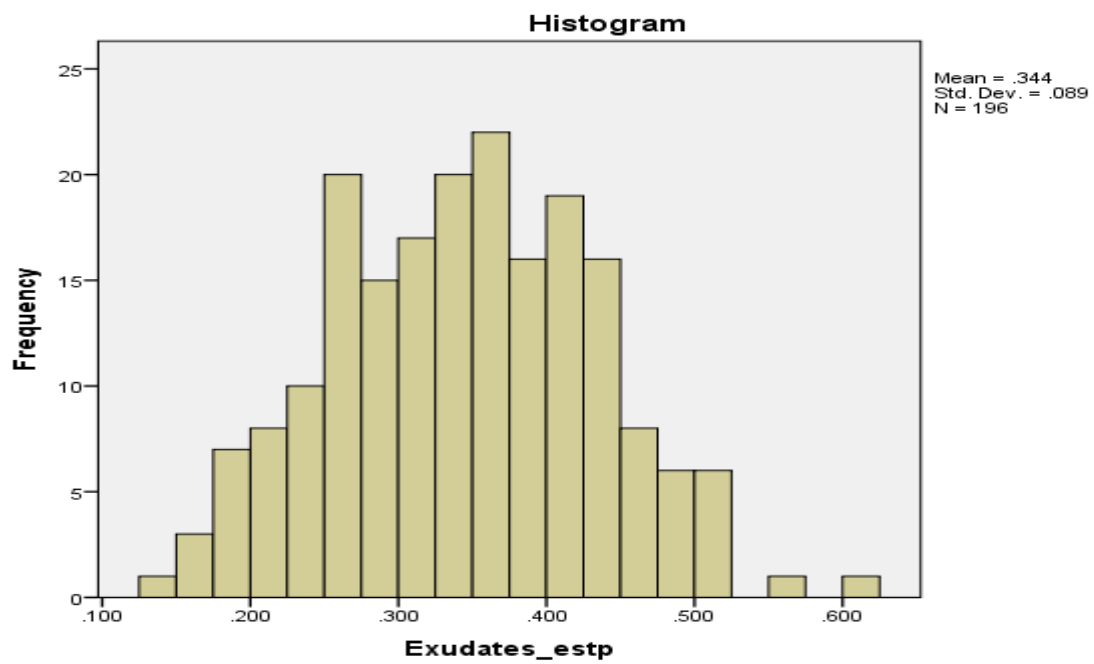

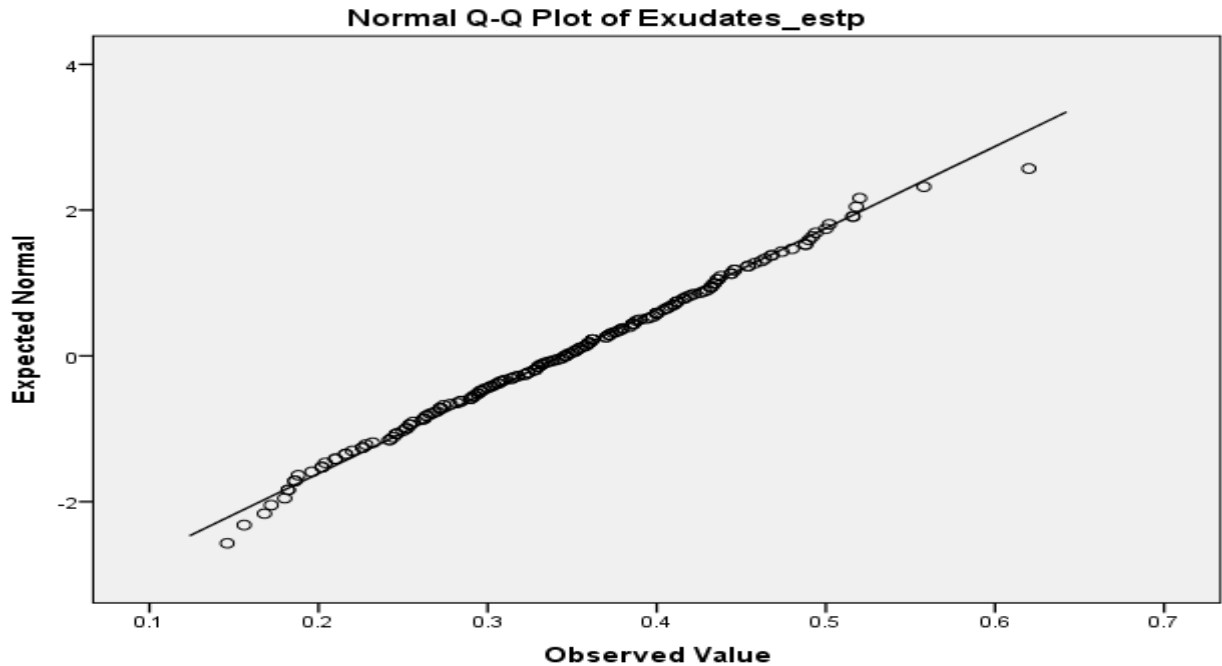

Comments: approximately normal distribution

| Tests of Normality |                                 |     |       |              |     |      |
|--------------------|---------------------------------|-----|-------|--------------|-----|------|
|                    | Kolmogorov-Smirnov <sup>a</sup> |     |       | Shapiro-Wilk |     |      |
|                    | Statistic                       | df  | Sig.  | Statistic    | df  | Sig. |
| CRAE_est           | .161                            | 196 | .000  | .908         | 196 | .000 |
| CRVE_est           | .204                            | 196 | .000  | .842         | 196 | .000 |
| AVR_est            | .065                            | 196 | .045  | .986         | 196 | .046 |
| Vasym_est          | .072                            | 196 | .016  | .986         | 196 | .055 |
| Aasym_est          | .043                            | 196 | .200* | .993         | 196 | .426 |
| Vangle_est         | .085                            | 196 | .002  | .961         | 196 | .000 |
| Aangle_est         | .085                            | 196 | .002  | .970         | 196 | .000 |
| BCV_est            | .060                            | 196 | .088  | .982         | 196 | .012 |
| BCA_est            | .070                            | 196 | .019  | .964         | 196 | .000 |
| Tortuosity_estp    | .069                            | 196 | .026  | .982         | 196 | .011 |
| Nipping_estp       | .039                            | 196 | .200* | .995         | 196 | .725 |
| Hemorrhage_estp    | .047                            | 196 | .200* | .987         | 196 | .064 |
| Aocclusion_estp    | .125                            | 196 | .000  | .944         | 196 | .000 |
| Exudates_estp      | .035                            | 196 | .200* | .994         | 196 | .608 |

\*. This is a lower bound of the true significance.

a. Lilliefors Significance Correction

Remark:

Notice that the **Shapiro-Wilk test** is kind of a specific **test** for normality, whereas the method used by **Kolmogorov-Smirnov test** is more general, but less powerful (meaning it correctly rejects the null hypothesis of normality less often). Also there is such a test (equivalent to the Kolmogorov-Smirnov with estimated parameters) - the **Lilliefors test**; the normality-test version could be validly compared to the Shapiro-Wilk (and will generally have lower power).

After applied mann-whitney u test, we have

| Test Statistics <sup>a</sup> |              |              |             |                |                |             |             |                     |                     |
|------------------------------|--------------|--------------|-------------|----------------|----------------|-------------|-------------|---------------------|---------------------|
|                              | CRAE_<br>est | CRVE_<br>est | AVR_e<br>st | Vangle_<br>est | Aangle_<br>est | BCV_e<br>st | BCA_e<br>st | Tortuosity_e<br>stp | Aocclusion_<br>estp |
| Mann-Whitney U               | 3933.000     | 3693.500     | 3464.000    | 3709.500       | 3770.500       | 3780.500    | 3821.500    | 3239.000            | 3734.000            |
| Wilcoxon W                   | 7254.000     | 7014.500     | 8414.000    | 8659.500       | 8720.500       | 8730.500    | 7142.500    | 6560.000            | 8684.000            |
| Z                            | -.220        | -.909        | -1.569      | -.863          | -.687          | -.658       | -.541       | -2.216              | -.792               |
| Asymp. Sig. (2-tailed)       | .826         | .364         | .117        | .388           | .492           | .510        | .589        | .027                | .428                |

a. Grouping Variable: TCM2type

Comments: above results may need to be replaced in Table1.

Part2. For categorical variables (only clinical characteristics)

| Crosstab |   |          |    |       |
|----------|---|----------|----|-------|
| Count    |   |          |    |       |
|          |   | TCM2type |    | Total |
|          |   | 0        | 1  |       |
| Gender   | 0 | 28       | 19 | 47    |
|          | 1 | 53       | 80 | 133   |
| Total    |   | 81       | 99 | 180   |

### Chi-Square Tests

|                                    | Value              | df | Asymp. Sig. (2-sided) | Exact Sig. (2-sided) | Exact Sig. (1-sided) |
|------------------------------------|--------------------|----|-----------------------|----------------------|----------------------|
| Pearson Chi-Square                 | 5.459 <sup>a</sup> | 1  | .019                  | .026                 | .015                 |
| Continuity Correction <sup>b</sup> | 4.691              | 1  | .030                  |                      |                      |
| Likelihood Ratio                   | 5.451              | 1  | .020                  |                      |                      |
| Fisher's Exact Test                |                    |    |                       |                      |                      |
| Linear-by-Linear Association       | 5.429              | 1  | .020                  |                      |                      |
| N of Valid Cases                   | 180                |    |                       |                      |                      |

a. 0 cells (0.0%) have expected count less than 5. The minimum expected count is 21.15.

b. Computed only for a 2x2 table

### Crosstab

Count

|                  |   | TCM2type |    | Total |
|------------------|---|----------|----|-------|
|                  |   | 0        | 1  |       |
| Drinking_History | 0 | 70       | 74 | 144   |
|                  | 1 | 11       | 25 | 36    |
| Total            |   | 81       | 99 | 180   |

### Chi-Square Tests

|                                    | Value              | df | Asymp. Sig. (2-sided) | Exact Sig. (2-sided) | Exact Sig. (1-sided) |
|------------------------------------|--------------------|----|-----------------------|----------------------|----------------------|
| Pearson Chi-Square                 | 3.793 <sup>a</sup> | 1  | .051                  | .062                 | .038                 |
| Continuity Correction <sup>b</sup> | 3.099              | 1  | .078                  |                      |                      |
| Likelihood Ratio                   | 3.899              | 1  | .048                  |                      |                      |
| Fisher's Exact Test                |                    |    |                       |                      |                      |
| Linear-by-Linear Association       | 3.772              | 1  | .052                  |                      |                      |
| N of Valid Cases                   | 180                |    |                       |                      |                      |

a. 0 cells (0.0%) have expected count less than 5. The minimum expected count is 16.20.

b. Computed only for a 2x2 table

### Crosstab

Count

|          |   | TCM2type |    | Total |
|----------|---|----------|----|-------|
|          |   | 0        | 1  |       |
| insomnia | 0 | 44       | 70 | 114   |
|          | 1 | 37       | 29 | 66    |
| Total    |   | 81       | 99 | 180   |

#### Chi-Square Tests

|                                    | Value              | df | Asymp. Sig. (2-sided) | Exact Sig. (2-sided) | Exact Sig. (1-sided) |
|------------------------------------|--------------------|----|-----------------------|----------------------|----------------------|
| Pearson Chi-Square                 | 5.151 <sup>a</sup> | 1  | .023                  | .029                 | .017                 |
| Continuity Correction <sup>b</sup> | 4.470              | 1  | .035                  |                      |                      |
| Likelihood Ratio                   | 5.151              | 1  | .023                  |                      |                      |
| Fisher's Exact Test                |                    |    |                       |                      |                      |
| Linear-by-Linear Association       | 5.122              | 1  | .024                  |                      |                      |
| N of Valid Cases                   | 180                |    |                       |                      |                      |

a. 0 cells (0.0%) have expected count less than 5. The minimum expected count is 29.70.

b. Computed only for a 2x2 table

#### Crosstab

Count

|              |   | TCM2type |    | Total |
|--------------|---|----------|----|-------|
|              |   | 0        | 1  |       |
| hypertension | 0 | 19       | 22 | 41    |
|              | 1 | 62       | 77 | 139   |
| Total        |   | 81       | 99 | 180   |

#### Chi-Square Tests

|                                    | Value             | df | Asymp. Sig. (2-sided) | Exact Sig. (2-sided) | Exact Sig. (1-sided) |
|------------------------------------|-------------------|----|-----------------------|----------------------|----------------------|
| Pearson Chi-Square                 | .039 <sup>a</sup> | 1  | .844                  | .860                 | .492                 |
| Continuity Correction <sup>b</sup> | .000              | 1  | .986                  |                      |                      |
| Likelihood Ratio                   | .039              | 1  | .844                  |                      |                      |
| Fisher's Exact Test                |                   |    |                       |                      |                      |
| Linear-by-Linear Association       | .038              | 1  | .845                  |                      |                      |
| N of Valid Cases                   | 180               |    |                       |                      |                      |

- a. 0 cells (0.0%) have expected count less than 5. The minimum expected count is 18.45.
- b. Computed only for a 2x2 table

**Crosstab**

Count

|          |   | TCM2type |    | Total |
|----------|---|----------|----|-------|
|          |   | 0        | 1  |       |
| diabetes | 0 | 42       | 55 | 97    |
|          | 1 | 39       | 44 | 83    |
| Total    |   | 81       | 99 | 180   |

**Chi-Square Tests**

|                                    | Value             | df | Asymp. Sig. (2-sided) | Exact Sig. (2-sided) | Exact Sig. (1-sided) |
|------------------------------------|-------------------|----|-----------------------|----------------------|----------------------|
| Pearson Chi-Square                 | .246 <sup>a</sup> | 1  | .620                  | .654                 | .365                 |
| Continuity Correction <sup>b</sup> | .119              | 1  | .730                  |                      |                      |
| Likelihood Ratio                   | .246              | 1  | .620                  |                      |                      |
| Fisher's Exact Test                |                   |    |                       |                      |                      |
| Linear-by-Linear Association       | .245              | 1  | .621                  |                      |                      |
| N of Valid Cases                   | 180               |    |                       |                      |                      |

- a. 0 cells (0.0%) have expected count less than 5. The minimum expected count is 37.35.
- b. Computed only for a 2x2 table

**Crosstab**

Count

|                        |   | TCM2type |    | Total |
|------------------------|---|----------|----|-------|
|                        |   | 0        | 1  |       |
| Coronary_Heart_Disease | 0 | 61       | 71 | 132   |
|                        | 1 | 20       | 28 | 48    |
| Total                  |   | 81       | 99 | 180   |

### Chi-Square Tests

|                                    | Value             | df | Asymp. Sig. (2-sided) | Exact Sig. (2-sided) | Exact Sig. (1-sided) |
|------------------------------------|-------------------|----|-----------------------|----------------------|----------------------|
| Pearson Chi-Square                 | .294 <sup>a</sup> | 1  | .588                  | .615                 | .356                 |
| Continuity Correction <sup>b</sup> | .139              | 1  | .709                  |                      |                      |
| Likelihood Ratio                   | .295              | 1  | .587                  |                      |                      |
| Fisher's Exact Test                |                   |    |                       |                      |                      |
| Linear-by-Linear Association       | .292              | 1  | .589                  |                      |                      |
| N of Valid Cases                   | 180               |    |                       |                      |                      |

a. 0 cells (0.0%) have expected count less than 5. The minimum expected count is 21.60.

b. Computed only for a 2x2 table

### Crosstab

Count

|                           |   | TCM2type |    | Total |
|---------------------------|---|----------|----|-------|
|                           |   | 0        | 1  |       |
| Abnormal_lipid_metabolism | 0 | 54       | 70 | 124   |
|                           | 1 | 27       | 29 | 56    |
| Total                     |   | 81       | 99 | 180   |

### Chi-Square Tests

|                                    | Value             | df | Asymp. Sig. (2-sided) | Exact Sig. (2-sided) | Exact Sig. (1-sided) |
|------------------------------------|-------------------|----|-----------------------|----------------------|----------------------|
| Pearson Chi-Square                 | .339 <sup>a</sup> | 1  | .560                  | .628                 | .336                 |
| Continuity Correction <sup>b</sup> | .177              | 1  | .674                  |                      |                      |
| Likelihood Ratio                   | .339              | 1  | .561                  |                      |                      |
| Fisher's Exact Test                |                   |    |                       |                      |                      |
| Linear-by-Linear Association       | .337              | 1  | .561                  |                      |                      |
| N of Valid Cases                   | 180               |    |                       |                      |                      |

a. 0 cells (0.0%) have expected count less than 5. The minimum expected count is 25.20.

b. Computed only for a 2x2 table

### Crosstab

Count

|  | TCM2type | Total |
|--|----------|-------|
|--|----------|-------|

|                   |   | 0  | 1  |     |
|-------------------|---|----|----|-----|
| High_homocysteine | 0 | 74 | 86 | 160 |
|                   | 1 | 7  | 13 | 20  |
| Total             |   | 81 | 99 | 180 |

#### Chi-Square Tests

|                                    | Value             | df | Asymp. Sig. (2-sided) | Exact Sig. (2-sided) | Exact Sig. (1-sided) |
|------------------------------------|-------------------|----|-----------------------|----------------------|----------------------|
| Pearson Chi-Square                 | .909 <sup>a</sup> | 1  | .340                  |                      |                      |
| Continuity Correction <sup>b</sup> | .511              | 1  | .475                  |                      |                      |
| Likelihood Ratio                   | .926              | 1  | .336                  |                      |                      |
| Fisher's Exact Test                |                   |    |                       | .475                 | .239                 |
| Linear-by-Linear Association       | .904              | 1  | .342                  |                      |                      |
| N of Valid Cases                   | 180               |    |                       |                      |                      |

a. 0 cells (0.0%) have expected count less than 5. The minimum expected count is 9.00.

b. Computed only for a 2x2 table

Comments: Based on above results, we use the general chi-square test (i.e., Person Chi-square test) except the last variable we may apply the test of continuity correction since the minimum expected count is between 5 to 10. (No need Fisher's Exact Test at all here).
