# Supplementary material for: The Discriminative Efficacy of Retinal Characteristics on Two Traditional Chinese Syndromes in Association with Ischemic Stroke
Source: Evid Based Complement Alternat Med. 2020 Mar 26;2020:6051831. doi: 10.1155/2020/6051831 (PMC7136789; doi:10.1155/2020/6051831)
Supplement: Supplementary Materials — These are the retinal images of 196 patients recruited in the study. Supplementary for univariate analysis. [file 6051831.f1.zip]

Archive with 2 entries (2 files):
- 6051831.f1/mat.6051831.v3 (1).pdf
- 6051831.f1/Retinal images.pdf
